# Supplementary material for: In vitrofermentation potential of the residue of Korean red ginseng root in a mixed culture of swine faecal bacteria
Source: Royal Society of Chemistry journal article supplement (doi:10.1039/d0fo00423e), 2020-01-01
Supplement: d0fo00423e2.pdf [file d0fo00423e2.pdf]

1 **Supplementary Table 1.**

- 2 Chemical composition of red ginseng residue (GR) and dried enzyme-resistant fraction  
3 (as crude ginseng-insoluble fibre, CGF)

| (g/100 g)                        | GR   | CGF               |
|----------------------------------|------|-------------------|
| Yield (%) <sup>1</sup>           | –    | 67.4              |
| Ash                              | 3.32 | 6.98              |
| Lipid                            | 0.72 | 0.22              |
| Protein                          | 13.7 | 17.9              |
| Water                            | 8.30 | 10.6              |
| Carbohydrate                     | 74.0 | 64.3              |
| Digestible starch                | 28.2 | –                 |
| RS                               | 4.11 | 7.29              |
| Soluble fibre                    | 4.68 | –                 |
| Insoluble fibre                  | 37.0 | 54.9 <sup>2</sup> |
| Indigestible matter <sup>3</sup> | 45.8 | 62.2              |

- 4 <sup>1</sup>Calculated as the weight of enzyme-resistant fraction of GR vs. the weight of GR ( $\times 100$ ).

- 5 <sup>2</sup>Calculated as dividing the content of insoluble fibre in GR with the yield of CGF.

- 6 <sup>3</sup>Indigestible matter = resistant starch (RS) + dietary fibre.

7

8

9
